# Supplementary material for: Synthesis of two novel dinuclear palladium(i) complexes and studies of their catalytic activity in amination reactions
Source: Royal Society of Chemistry journal article supplement (doi:10.1039/b402283a), 2004-01-01
Supplement: b402283a.doc [file b402283a.doc]

**Supporting Information**

### Synthesis of two novel dinuclear palladium(I) complexes and studies of their catalytic activity in amination reactions

###

Ute Christmann,Ramón Vilar,* Andrew J. P. White and David J. Williams

Department of Chemistry

Imperial College London

South Kensington

London SW7 2AY, UK

**General Methods:** All manipulations were carried out in an atmosphere of dry dinitrogen or argon using standard Schlenk tube techniques unless otherwise stated. Solvents were dried from the appropriate drying agent, distilled, degassed and stored under nitrogen. The 1H and 13C{1H} NMR spectra were recorded on a DRX 400 or AM-500 Bruker spectrometer with residual solvent signals as internal reference. The 31P{1H} NMR spectra were recorded on a JEOL-EX270 spectrometer H3PO4 as reference.Elemental analyses were carried out at the London Metropolitan University.

**Synthesis of 1:** [Pd2(dba)3].C6H6 (102 mg, 0.103 mmol) and 2-(Di-*tert*-butylphosphino)biphenyl (61 mg, 0.205 mmol) were dissolved in toluene (15 ml) and stirred for 2 days. After this time the solvent was removed under reduced pressure yielding an orange-red oil which was dissolved in diethyl ether and few drops of hexane added to induce crystallization. The resulting solution was cooled to 20°C overnight to yield orange crystals (one of which was selected for the crystallographic analysis).After filtration the crystals were washed with cold diethyl ether (3 x 3 ml) and dried under reduced pressure (38 mg, 29%). Anal. Calcd for C37H41OPPdC6H14: C, 71.21; H, 7.64; found C, 71.56; H, 7.76.31P {1H} NMR (109 MHz, toluene-d8) ** 59.5 (s); FAB(+) MS *m*/*z* 638 (M+), 404 (PdPR3)+.

**Synthesis of 2:** [Pd2(dba)3].C6H6 (198 mg, 0.199 mmol) and 2-(Di-*tert*-butylphosphino)biphenyl (124 mg, 0.418 mmol) were dissolved in toluene (15 ml). The reaction mixture was stirred for 2 days to yield a red-orange solution. Pd(COD)Br2 (149 mg, 0.398 mmol) was then added and the reaction mixture was stirred for further 4 h by which time a dark solid precipitated. The volume of the reaction mixture was concentrated under reduced pressure to approximately 2/3 of the original volume and the solid obtained was separated by cannula filtration. The solid was extracted with THF; this solution was then concentrated and layered with hexane to yield a dark-brown crystalline solid (120 mg, 45%). Single crystals suitable for X-ray crystallographic analysis were obtained by layering a THF solution of **2** with hexane. Anal. Calcd for C20H27Br2PPd2: C, 35.80, H, 4.06. Found: C, 35.89, H, 4.01. 1H NMR (500 MHz, thf-d8)  1.36 (d, 3*J*PH = 14.9 Hz, 18 H, *t*Bu3), 6.14 (m, 2H), 6.39 (m, 2H), 6.83 (m, 1H), 7.41 (m, 1H), 7.56 (m, 1H), 7.645 (m, 1H), 7.90 (m, 1H); 31P{1H} NMR (109 MHz, thf-d8) ** 67.7 (s); FAB(+) MS: *m*/*z* 591 (M-Br)+.

**Synthesis of 3:** An analogous procedure to that described for **2** was employed to prepare complex **3**. The amounts used are: [Pd2dba].C6H6 (157 mg, 0.158 mmol), 2-(Di-*tert*-butylphosphino)biphenyl (95 mg, 0.317 mmol) and Pd(COD)Cl2 (91 mg, 0.316 mmol) to yield a dark green solid which was washed with diethyl ether (3 x 10 ml) and dried under reduced pressure (132 mg, 71%). Single crystals suitable for an X-ray analysis were obtained by layering a THF solution of **3** with hexane. Anal. Calcd for C20H27Cl2PPd2: C, 41.26, H, 4.60. Found: C 40.99, H 4.42 . 1H NMR (500 MHz, CD2Cl2)  1.36 (d, 3*J*PH = 14.9 Hz, 18H, *t*Bu3), 6.04 (m, 2H, H2, H6), 6.44 (m, 2H, H3, H5), 6.60 (m, 1H, H4), 7.33 (m, 1H, H8), 7.54 (m, 1H, H10), 7.62 (m, 1H, H9), 7.75 (m, 1H, H11). 13C NMR (100 MHz, CD2Cl2) 30.0 (d, 2*J*PC = 5.5, CH3), 36.3 (d, *J*PC = 11.5, CMe3), 69.9 (d, 3*J*PC = 1.3, C4) 105.0 (d, 2*J*PC = 6.6, C1), 107.8 (d, 3*J*PC = 3.2, C3,C5), 110.0 (d, 2*J*PC = 3.5, C2,C6), 129.1 (d, 3*J*PC = 4.7, C10), 132.5 (d, 4*J*PC = 4.3, C9), , 132.6 (d, 3*J*PC = 19.0, C8), 133.7 (d, 2*J*PC = 1.7, C11), 136.9 (d, 1*J*PC = 32.8, C12), 146.9 (d, 2*J*PC = 19.8, C7); 31P{1H} NMR (109 MHz, CD2Cl2): ** 62.0 (s); FAB(+) MS: *m*/*z* 549 (M – Cl)+.

**General procedure for the room-temperature catalytic amination of aryl halides:** An oven dried Schlenk tube was charged with the corresponding catalysts (0.01 mmol of either **2** or **3**) and NaO*t*Bu (1.4 mmol). The Schlenk tube was then evacuated and backfilled with argon. The corresponding aryl halide (1.0 mmol) and amine (1.2 mmol) were added to the Schlenk tube followed by THF (1 ml). The mixture was stirred at room temperature. After all the aryl halide had been consumed (or no further conversion was detected by GC-MS) the reaction mixture was quenched with water. Dichloromethane was added to the mixture to extract the organic product; the organic layer was separated, dried with MgSO4 and concentrated. The mixture was passed through a silica gel column using a hexane/ethyl acetate mixture to elute and purify the product.

**Table 1, entries 1 and 2**: The spectroscopic data of (4-*t*-butylphenyl)diphenylamine were identical to those published before.[1]

**Table 1, entries 3 and 4**: The spectroscopic data of di-*p*-tolylamine were identical to those published before.[2]

**Crystallographic information:** CCDC 224107 (**1**), 224108 (**2**) and 224109 (**3**) contains the supplementary crystallographic data for this paper. These data can be obtained online free of charge (or from the Cambridge Crystallographic Data Centre, 12, Union Road, Cambridge CB2 1EZ, UK; fax: (+44) 1223-336-033; or [deposit@ccdc.cam.ac.uk](mailto:deposit@ccdc.cam.ac.uk)).

The molecular structure of **3** is shown in Figure S1.


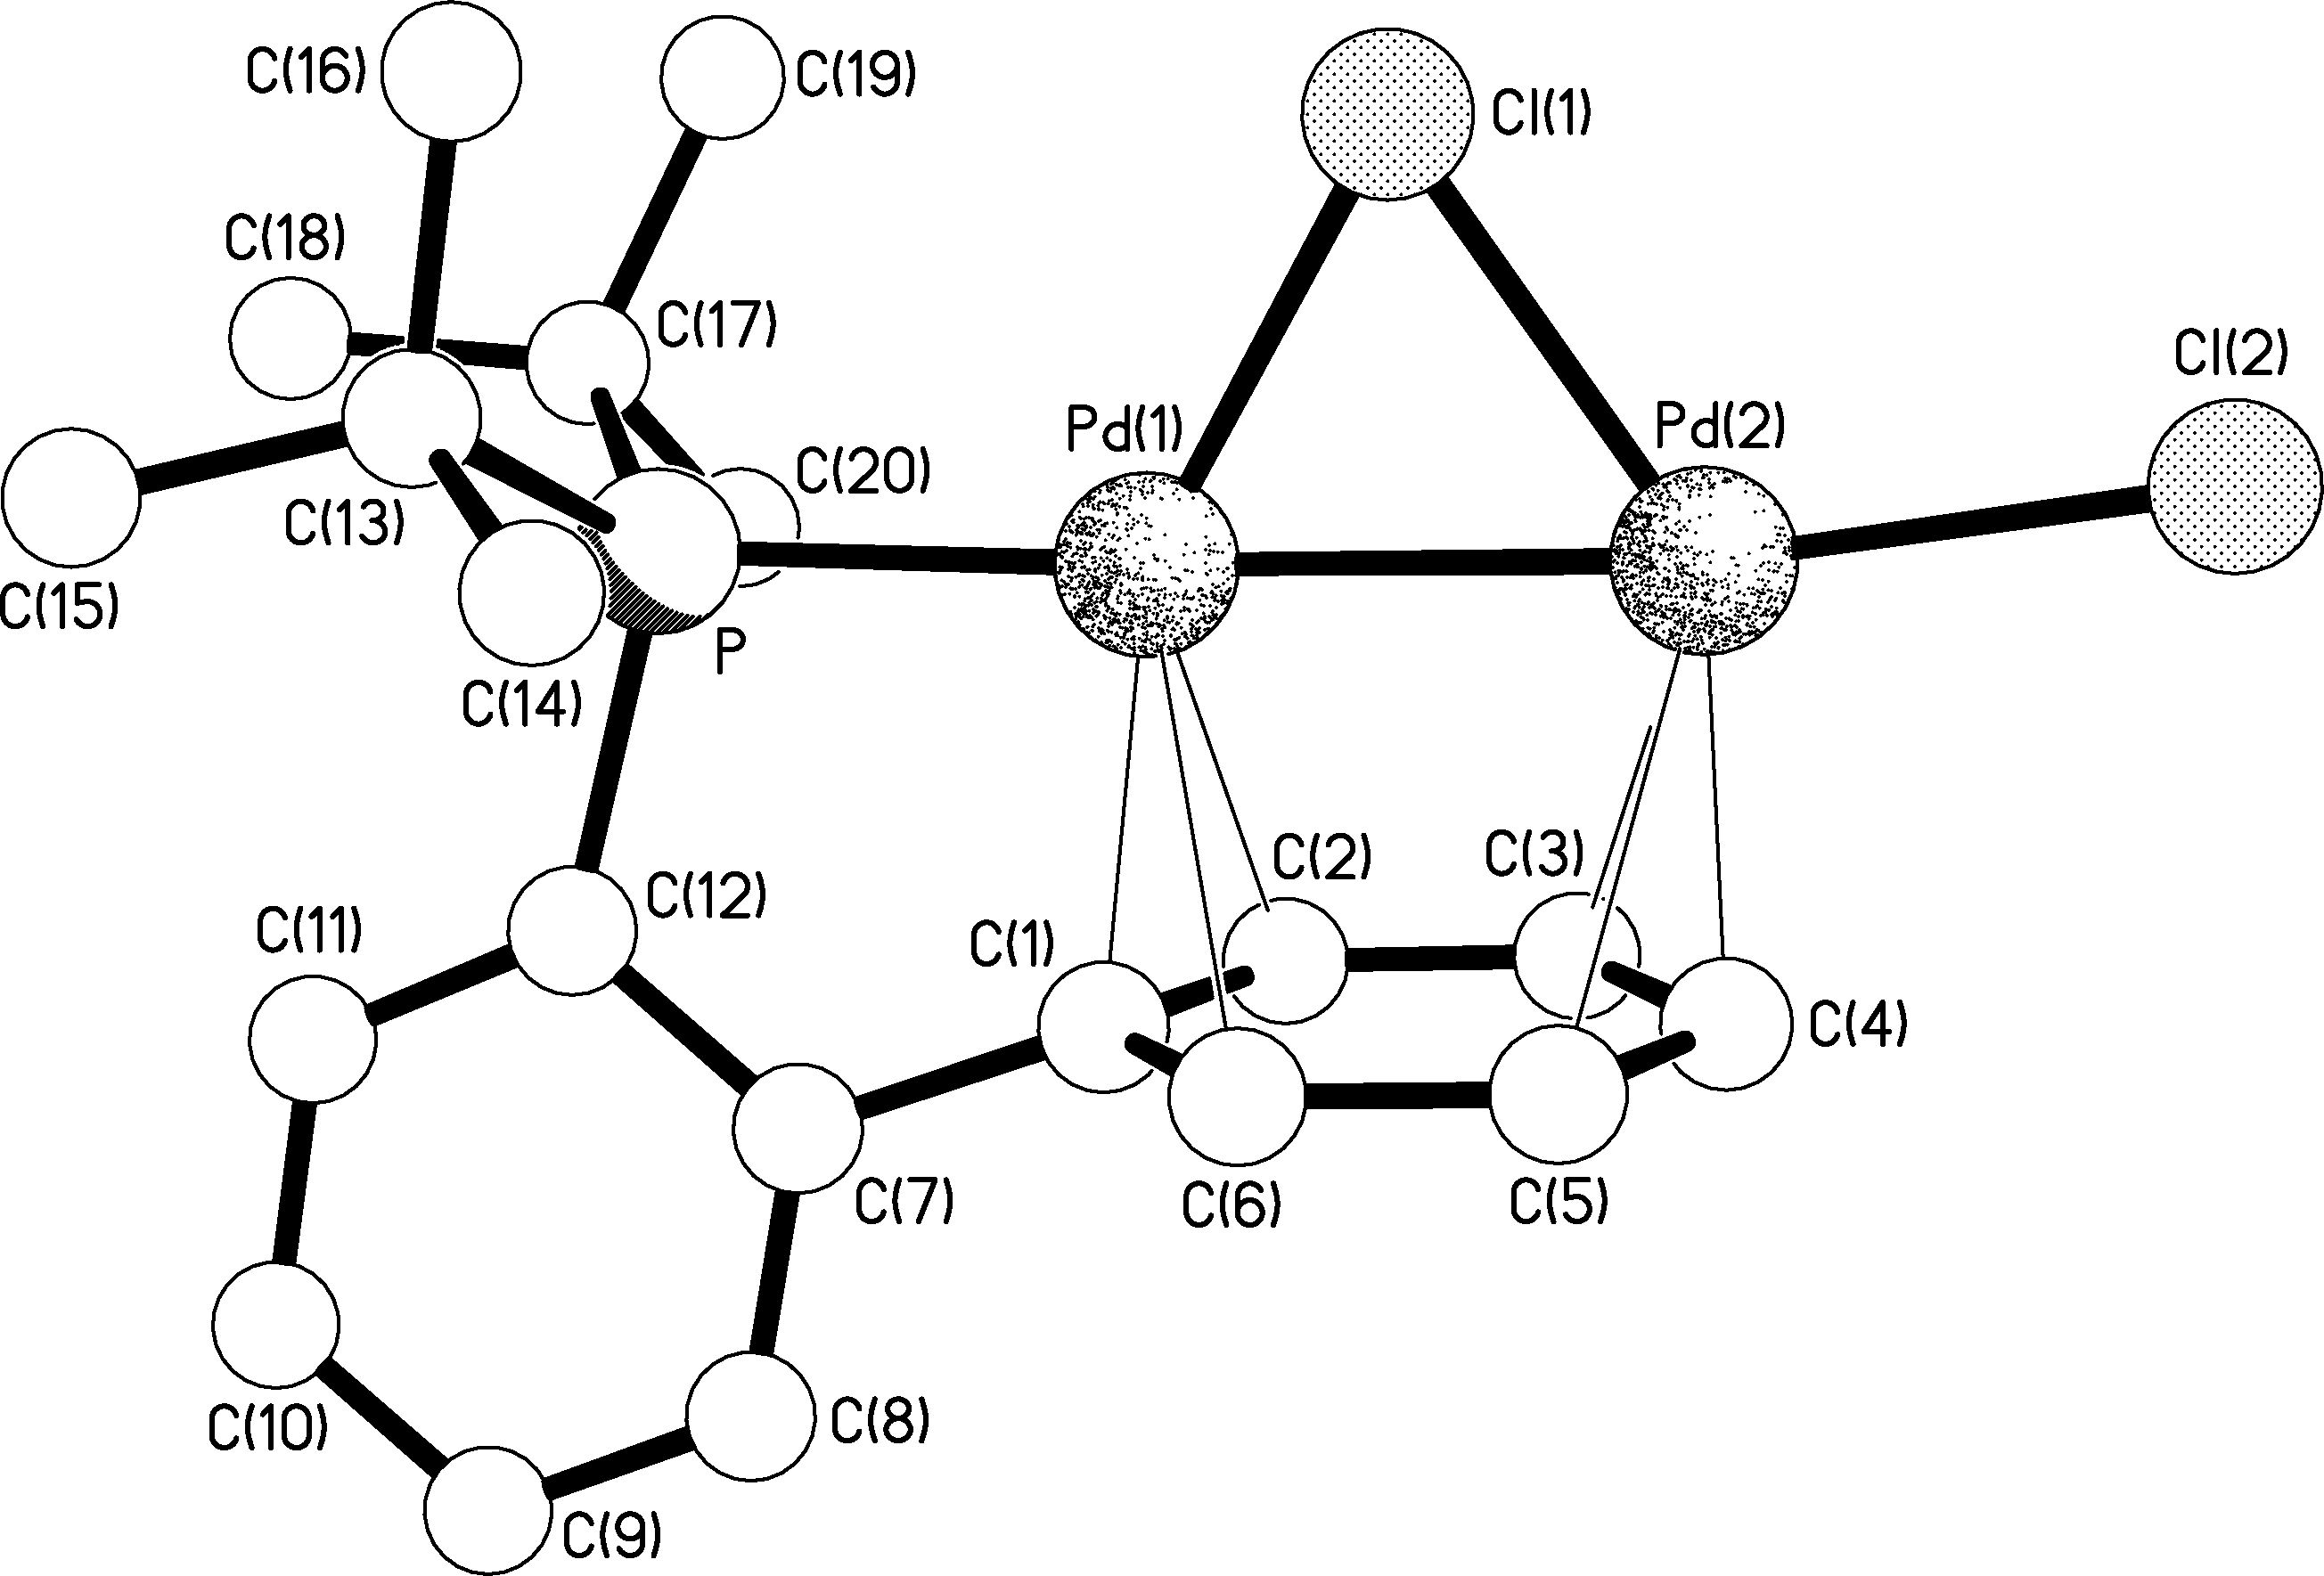


Figure S1 – Molecular structure of complex **3**.

**References:**

[1] J.P. Stambuli, R. Kuwano, J.F. Hartwig, *Angew. Chem. Int. Ed.,* **2002**, *41*, 4746.

[2] J.P. Wolfe, S.L. Buchwald. *J. Am. Chem. Soc.*, **1997**, *119*, 6054.
